# Supplementary material for: Perfluoroalkyl Acids in Maternal Serum and Indices of Fetal Growth: The Aarhus Birth Cohort
Source: PubMed Central journal article supplement (PMC4892925; doi:10.1289/ehp.1510046), 2015-10-23
Supplement: ehp.1510046.s001.acco.pdf [file ehp.1510046.s001.acco.pdf]

**Note to readers with disabilities:** *EHP* strives to ensure that all journal content is accessible to all readers. However, some figures and Supplemental Material published in *EHP* articles may not conform to [508 standards](#) due to the complexity of the information being presented. If you need assistance accessing journal content, please contact [ehp508@niehs.nih.gov](mailto:ehp508@niehs.nih.gov). Our staff will work with you to assess and meet your accessibility needs within 3 working days.

## **Supplemental Material**

### **Perfluoroalkyl Acids in Maternal Serum and Indices of Fetal Growth: The Aarhus Birth Cohort**

Cathrine Carlsen Bach, Bodil Hammer Bech, Ellen Aagaard Nohr, Jørn Olsen, Niels Bjerregård Matthiesen, Eva Cecilie Bonfeld-Jørgensen, Rossana Bossi, and Tine Brink Henriksen

#### **Table of Contents**

**Figure S1.** Directed acyclic graph illustrating the association between perfluoroalkyl acid (PFAA) exposure and birth weight. The figure also applies to the outcomes birth length and head circumference at birth. In the main analyses we conditioned on the variables marked with white circles. According to this graph it was not necessary to condition on the variables marked with grey circles. Figure made by use of daggity.net (Textor et al. 2011).

**Figure S2.** Directed acyclic graph illustrating the association between perfluoroalkyl acid (PFAA) exposure and preterm birth. The illustration also applies to the continuous gestational age outcome. In the main analyses we conditioned on the variables marked with white circles. According to this graph it was not necessary to condition on the variables marked with grey circles. Figure made by use of daggity.net (Textor et al. 2011).

**Figure S3.** Restricted cubic splines with pre-specified knots according to quartile boundaries of PFAAs. Illustrates the association between individual PFAAs and birth weight, adjusted for maternal pre-pregnancy body mass index, educational level, and age. The shading indicates 95 % confidence intervals. See PFAA abbreviations in Table 1 in the main document.

**Table S1.** Perfluoroalkyl acid abbreviations, limits of quantification (LOQ), and levels above the

LOQ for compounds not included in the study of 1507 women from the Aarhus Birth Cohort, 2008-2013.

**Table S2.** Pearson's correlations for perfluoroalkyl acids in 1507 women from the Aarhus Birth Cohort, 2008-2013.

**Table S3.** Levels of perfluoroalkyl acids, birth length (n= 1499) and head circumference at birth (n=1494) in the Aarhus Birth Cohort, 2008-2013.

**Table S4.** Levels of perfluoroalkyl acids and gestational length at birth or preterm birth in 1507 children from the Aarhus Birth Cohort, 2008-2013.

## **References**

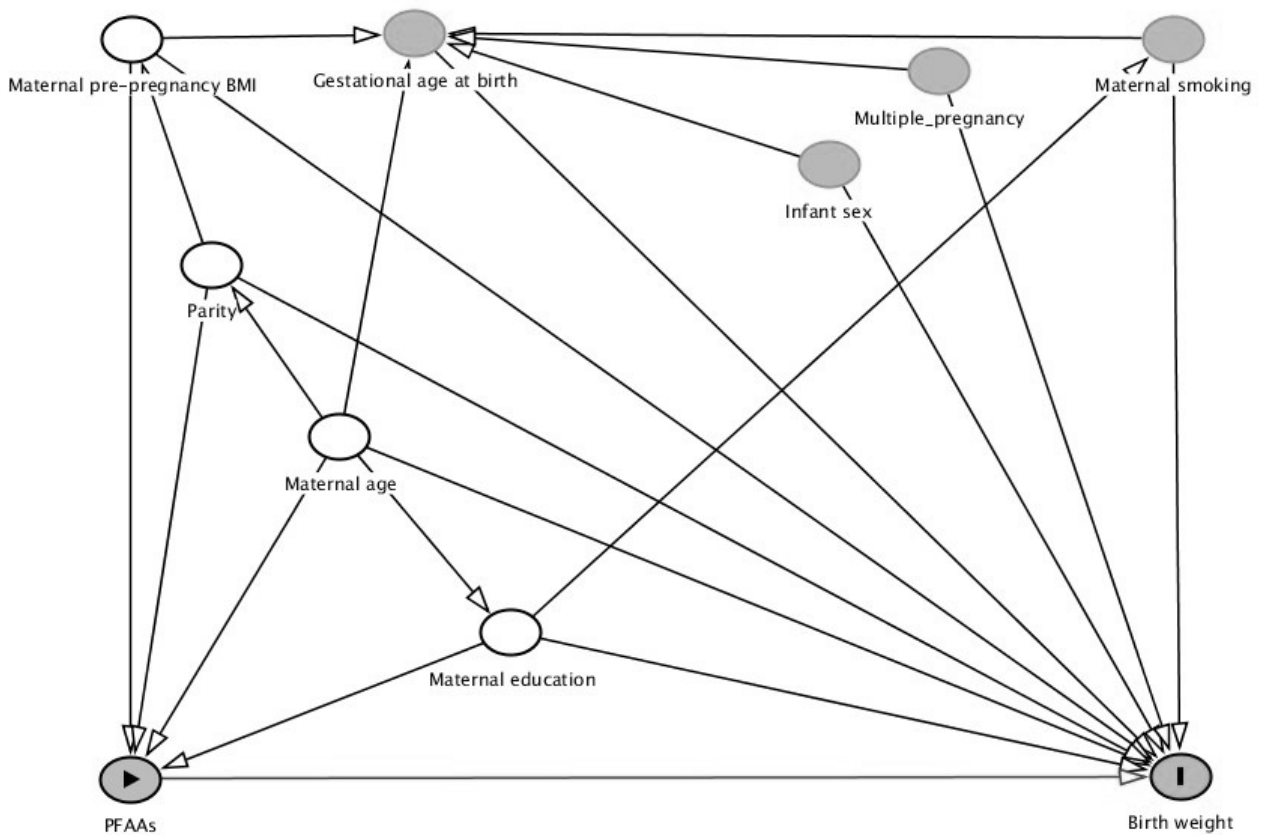

**Figure S1.** Directed acyclic graph illustrating the association between perfluoroalkyl acid (PFAA) exposure and birth weight. The figure also applies to the outcomes birth length and head circumference at birth. In the main analyses we conditioned on the variables marked with white circles. According to this graph it was not necessary to condition on the variables marked with grey circles. Figure made by use of daggity.net (Textor et al. 2011).

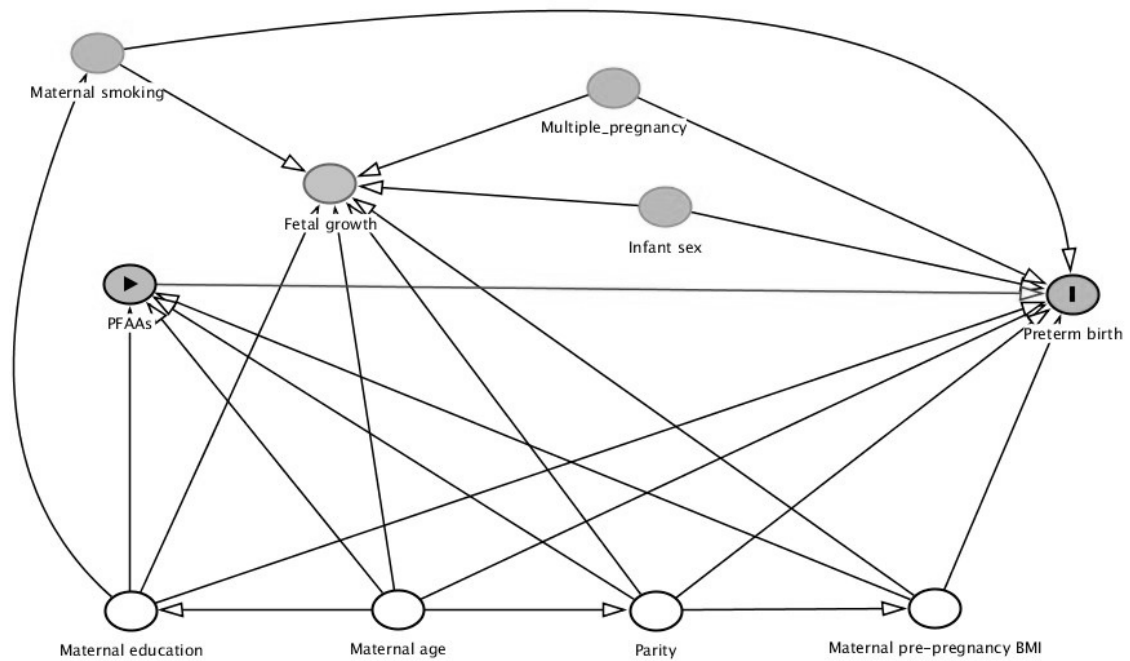

**Figure S2.** Directed acyclic graph illustrating the association between perfluoroalkyl acid (PFAA) exposure and preterm birth. The illustration also applies to the continuous gestational age outcome. In the main analyses we conditioned on the variables marked with white circles. According to this graph it was not necessary to condition on the variables marked with grey circles. Figure made by use of daggity.net (Textor et al. 2011).

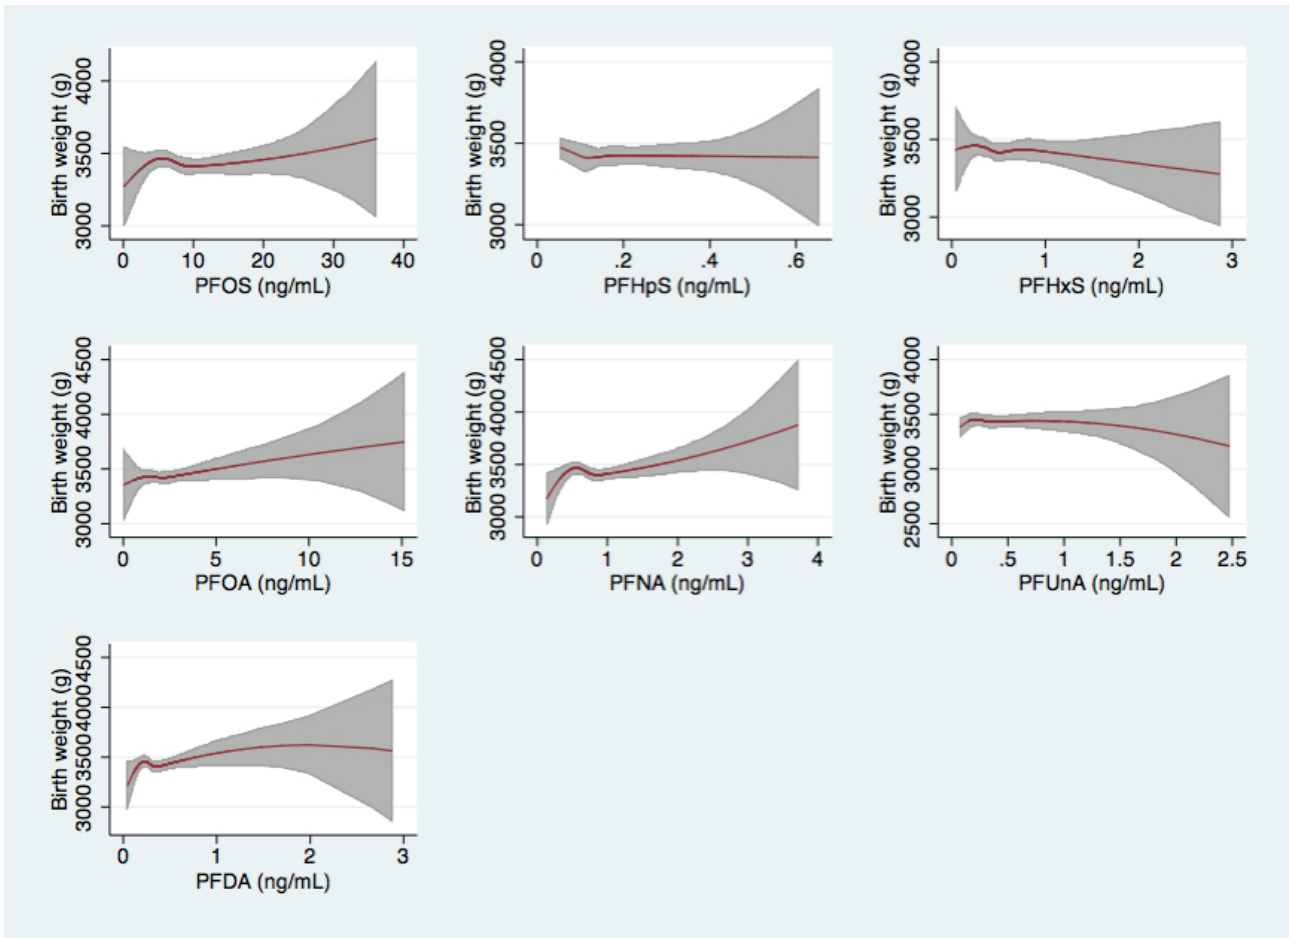

**Figure S3.** Restricted cubic splines with pre-specified knots according to quartile boundaries of PFAAs. Illustrates the association between individual PFAAs and birth weight, adjusted for maternal pre-pregnancy body mass index, educational level, and age. The shading indicates 95 % confidence intervals. See PFAA abbreviations in Table 1 in the main document.

**Table S1.** Perfluoroalkyl acid abbreviations, limits of quantification (LOQ), and levels above the LOQ for compounds not included in the study of 1507 women from the Aarhus Birth Cohort, 2008-2013.

| <b>Full name</b>            | <b>Abbreviation</b> | <b>LOQ<br/>ng/mL</b> | <b>% above LOQ</b> |
|-----------------------------|---------------------|----------------------|--------------------|
| Perfluorobutane sulfonate   | PFBS                | 0.07                 | 1                  |
| Perfluorodecane sulfonate   | PFDS                | 0.37                 | 0                  |
| Perfluorooctane sulfonamide | PFOSA               | 1.19                 | 0                  |
| Perfluoropentanoic acid     | PFPeA               | 0.19                 | 6                  |
| Perfluorohexanoic acid      | PFHxA               | 0.03                 | 2                  |
| Perfluoroheptanoic acid     | PFHpA               | 0.05                 | 26                 |
| Perfluorododecanoic acid    | PFDoA               | 0.41                 | 5                  |
| Perfluorotridecanoic acid   | PFTTrA              | 0.41                 | 0.3                |
| Perfluorotetradecanoic acid | PFTTeA              | 0.41                 | 0                  |

**Table S2.** Pearson's correlations for perfluoroalkyl acids in 1507 women from the Aarhus Birth Cohort, 2008-2013.

|       | PFHxS | PFHpS | PFOS | PFOA | PFNA | PFDA |
|-------|-------|-------|------|------|------|------|
| PFHpS | 0.47  |       |      |      |      |      |
| PFOS  | 0.38  | 0.80  |      |      |      |      |
| PFOA  | 0.24  | 0.38  | 0.40 |      |      |      |
| PFNA  | 0.20  | 0.39  | 0.46 | 0.82 |      |      |
| PFDA  | 0.15  | 0.3   | 0.38 | 0.71 | 0.85 |      |
| PFUnA | 0.14  | 0.31  | 0.36 | 0.21 | 0.40 | 0.60 |

See PFAA abbreviations in Table 1 in the main document.

$p < 0.001$  for all correlations.

**Table S3.** Levels of perfluoroalkyl acids, birth length (n= 1499) and head circumference at birth (n=1494) in the Aarhus Birth Cohort, 2008-2013.

| PFAA  | Exposure scale      | Birth length (cm) |       |                   | Head circumference (cm) |       |                  |
|-------|---------------------|-------------------|-------|-------------------|-------------------------|-------|------------------|
|       |                     | Median (IQR)      | Crude | Adjusted          | Median (IQR)            | Crude | Adjusted         |
| PFHxS | Q1                  | 52 (50-53)        | Ref.  | Ref.              | 35 (34-36)              | Ref.  | Ref.             |
|       | Q2                  | 52 (50-53)        | 0.1   | 0.1 (-0.3, 0.4)   | 35 (34-36)              | -0.1  | -0.2 (-0.4, 0.1) |
|       | Q3                  | 52 (50-53)        | -0.1  | -0.1 (-0.5, 0.3)  | 35 (34-36)              | -0.2  | -0.2 (-0.5, 0.0) |
|       | Q4                  | 52 (50-53)        | -0.2  | -0.2 (-0.5, 0.2)  | 35 (34-36)              | -0.2  | -0.2 (-0.5, 0.1) |
|       | Per IQR (0.3 ng/mL) |                   | 0.0   | 0.0 (-0.1, 0.1)   |                         | -0.1  | 0.0 (-0.1, 0.0)  |
|       | Per 0.1 ng/mL       |                   | 0.0   | 0.0 (0.0, 0.0)    |                         | 0.0   | 0.0 (0.0, 0.0)   |
| PFHpS | Q1                  | 52 (51-53)        | Ref.  | Ref.              | 35 (34-36)              | Ref.  | Ref.             |
|       | Q2                  | 52 (50-53)        | -0.3  | -0.3 (-0.7, 0.03) | 35 (34-36)              | -0.1  | -0.1 (-0.3, 0.2) |
|       | Q3                  | 52 (50-53)        | -0.1  | -0.2 (-0.5, 0.2)  | 35 (34-36)              | 0.0   | 0.0 (-0.2, 0.2)  |
|       | Q4                  | 52 (50-53)        | -0.2  | -0.2 (-0.5, 0.2)  | 35 (34-36)              | 0.0   | 0.0 (-0.3, 0.2)  |
|       | Per IQR (0.1 ng/mL) |                   | 0.0   | 0.0 (-0.2, 0.1)   |                         | 0.0   | 0.0 (-0.1, 0.1)  |
|       | Per 0.1 ng/mL       |                   | 0.0   | 0.0 (-0.2, 0.1)   |                         | 0.0   | 0.0 (-0.1, 0.1)  |
| PFOS  | Q1                  | 52 (50-53)        | Ref.  | Ref.              | 35 (34-36)              | Ref.  | Ref.             |
|       | Q2                  | 52 (50-53)        | -0.3  | -0.3 (-0.7, 0.0)  | 35 (34-36)              | -0.2  | -0.2 (-0.5, 0.0) |
|       | Q3                  | 52 (50-53)        | -0.1  | -0.1 (-0.4, 0.3)  | 35 (34-36)              | -0.1  | -0.1 (-0.4, 0.1) |
|       | Q4                  | 52 (50-53)        | -0.1  | -0.1 (-0.5, 0.2)  | 35 (34-36)              | -0.1  | -0.1 (-0.3, 0.2) |
|       | Per IQR (4.8 ng/mL) |                   | 0.0   | 0.0 (-0.1, 0.2)   |                         | 0.0   | 0.0 (-0.1, 0.1)  |
|       | Per 0.1 ng/mL       |                   | 0.0   | 0.0 (0.0, 0.0)    |                         | 0.0   | 0.0 (0.0, 0.0)   |
| PFOA  | Q1                  | 52 (50-53)        | Ref.  | Ref.              | 35 (34-36)              | Ref.  | Ref.             |
|       | Q2                  | 52 (50-53)        | -0.1  | 0.0 (-0.4, 0.4)   | 35 (34-36)              | 0.0   | 0.0 (-0.2, 0.3)  |
|       | Q3                  | 52 (50-53)        | 0.0   | 0.0 (-0.4, 0.4)   | 35 (34-36)              | 0.1   | 0.1 (-0.2, 0.4)  |
|       | Q4                  | 52 (50-53)        | 0.0   | 0.1 (-0.3, 0.4)   | 35 (34-36)              | 0.1   | 0.1 (-0.1, 0.4)  |
|       | Per IQR (1.1 ng/mL) |                   | 0.1   | 0.1 (-0.1, 0.2)   |                         | 0.1   | 0.1 (0.0, 0.2)   |
|       | Per 0.1 ng/mL       |                   | 0.0   | 0.0 (0.0, 0.0)    |                         | 0.0   | 0.0 (0.0, 0.0)   |
| PFNA  | Q1                  | 52 (50-53)        | Ref.  | Ref.              | 35 (34-36)              | Ref.  | Ref.             |
|       | Q2                  | 52 (50-53)        | 0.1   | 0.1 (-0.3, 0.4)   | 35 (34-36)              | 0.2   | 0.1 (-0.1, 0.4)  |
|       | Q3                  | 52 (50-53)        | -0.2  | -0.2 (-0.6, 0.2)  | 35 (34-36)              | -0.2  | -0.2 (-0.4, 0.1) |
|       | Q4                  | 52 (50-53)        | 0.1   | 0.1 (-0.3, 0.4)   | 35 (34-36)              | 0.2   | 0.2 (-0.1, 0.4)  |
|       | Per IQR (0.4 ng/mL) |                   | 0.0   | 0.0 (-0.1, 0.1)   |                         | 0.1   | 0.1 (0.0, 0.2)   |
|       | Per 0.1 ng/mL       |                   | 0.0   | 0.0 (0.0, 0.0)    |                         | 0.0   | 0.0 (0.0, 0.0)   |
| PFDA  | Q1                  | 52 (50-53)        | Ref.  | Ref.              | 35 (34-36)              | Ref.  | Ref.             |
|       | Q2                  | 52 (50-53)        | 0.0   | 0.0 (-0.4, 0.3)   | 35 (34-36)              | 0.0   | -0.1 (-0.3, 0.2) |
|       | Q3                  | 52 (50-53)        | 0.2   | 0.2 (-0.2, 0.6)   | 35 (34-36)              | -0.1  | -0.1 (-0.3, 0.2) |
|       | Q4                  | 52 (50-53)        | 0.1   | 0.1 (-0.3, 0.5)   | 35 (34-36)              | 0.2   | 0.2 (-0.1, 0.5)  |
|       | Per IQR (0.2 ng/mL) |                   | 0.0   | 0.1 (-0.1, 0.2)   |                         | 0.1   | 0.1 (0.0, 0.2)   |
|       | Per 0.1 ng/mL       |                   | 0.0   | 0.0 (0.0, 0.1)    |                         | 0.1   | 0.1 (0.1, 0.1)   |



|              |                     |            |      |                 |            |      |                 |
|--------------|---------------------|------------|------|-----------------|------------|------|-----------------|
| <b>PFUnA</b> | Q1                  | 52 (50-53) | Ref. | Ref.            | 35 (34-36) | Ref. | Ref.            |
|              | Q2                  | 52 (50-53) | 0.1  | 0.2 (-0.2, 0.6) | 35 (34-36) | 0.0  | 0.0 (-0.2, 0.3) |
|              | Q3                  | 52 (50-53) | 0.2  | 0.3 (-0.1, 0.6) | 35 (34-36) | 0.0  | 0.0 (-0.2, 0.3) |
|              | Q4                  | 52 (50-53) | 0.1  | 0.2 (-0.2, 0.6) | 35 (34-36) | -0.1 | 0.0 (-0.2, 0.3) |
|              | Per IQR (0.2 ng/mL) |            | 0.0  | 0.1 (-0.1, 0.2) |            | 0.0  | 0.0 (-0.1, 0.1) |
|              | Per 0.1 ng/mL       |            | 0.0  | 0.0 (0.0, 0.1)  |            | 0.0  | 0.0 (0.0, 0.1)  |

Abbreviations: Quartile (Q), interquartile range (IQR), reference (Ref). See PFAA abbreviations in Table 1 in the main document. Adjusted for maternal age, pre-pregnancy body mass index, and educational level.

**Table S4.** Levels of perfluoroalkyl acids and gestational length at birth or preterm birth in 1507 children from the Aarhus Birth Cohort, 2008-2013.

| PFAA         | Exposure scale      | Gestational length (weeks) |       |                  | OR for Preterm birth |                   |
|--------------|---------------------|----------------------------|-------|------------------|----------------------|-------------------|
|              |                     | Median (IQR)               | Crude | Adjusted         | Crude                | Adjusted          |
| <b>PFHxS</b> | Q1                  | 40 (39-41)                 | Ref.  | Ref.             | Ref.                 | Ref.              |
|              | Q2                  | 40 (39-41)                 | 0.0   | 0.0 (-0.3, 0.2)  | 0.70                 | 0.72 (0.38, 1.37) |
|              | Q3                  | 40 (39-41)                 | 0.0   | 0.0 (-0.3, 0.2)  | 0.98                 | 0.97 (0.54, 1.77) |
|              | Q4                  | 40 (39-41)                 | 0.1   | 0.1 (-0.2, 0.4)  | 0.70                 | 0.68 (0.35, 1.31) |
|              | Per IQR (0.3 ng/mL) |                            | 0.0   | 0.0 (0.0, 0.1)   | 0.89                 | 0.87 (0.68, 1.13) |
|              | Per 0.1 ng/mL       |                            | 0.0   | 0.0 (0.0, 0.0)   | 0.96                 | 0.95 (0.87, 1.05) |
| <b>PFHpS</b> | Q1                  | 40 (39-41)                 | Ref.  | Ref.             | Ref.                 | Ref.              |
|              | Q2                  | 40 (39-41)                 | -0.2  | -0.2 (-0.5, 0.1) | 1.10                 | 1.10 (0.61, 1.97) |
|              | Q3                  | 40 (39-41)                 | 0.1   | 0.1 (-0.2, 0.3)  | 0.66                 | 0.67 (0.35, 1.31) |
|              | Q4                  | 40 (39-41)                 | 0.0   | 0.0 (-0.2, 0.3)  | 0.76                 | 0.76 (0.40, 1.46) |
|              | Per IQR (0.1 ng/mL) |                            | 0.0   | 0.0 (-0.1, 0.1)  | 0.93                 | 0.93 (0.65, 1.32) |
|              | Per 0.1 ng/mL       |                            | 0.0   | 0.0 (-0.1, 0.1)  | 0.93                 | 0.93 (0.68, 1.29) |
| <b>PFOS</b>  | Q1                  | 40 (39-41)                 | Ref.  | Ref.             | Ref.                 | Ref.              |
|              | Q2                  | 40 (39-41)                 | -0.1  | -0.1 (-0.4, 0.1) | 0.94                 | 0.96 (0.53, 1.74) |
|              | Q3                  | 40 (39-41)                 | 0.1   | 0.0 (-0.2, 0.3)  | 0.64                 | 0.65 (0.34, 1.26) |
|              | Q4                  | 40 (39-41)                 | 0.0   | 0.0 (-0.3, 0.2)  | 0.82                 | 0.82 (0.44, 1.53) |
|              | Per IQR (4.8 ng/mL) |                            | 0.0   | 0.0 (-0.1, 0.1)  | 0.84                 | 0.85 (0.60, 1.21) |
|              | Per 0.1 ng/mL       |                            | 0.0   | 0.0 (0.0, 0.0)   | 1.00                 | 1.00 (0.99, 1.00) |
| <b>PFOA</b>  | Q1                  | 40 (39-41)                 | Ref.  | Ref.             | Ref.                 | Ref.              |
|              | Q2                  | 40 (39-41)                 | 0.0   | 0.0 (-0.3, 0.2)  | 0.53                 | 0.51 (0.27, 0.98) |
|              | Q3                  | 40 (39-41)                 | 0.1   | 0.1 (-0.2, 0.3)  | 0.66                 | 0.67 (0.36, 1.25) |
|              | Q4                  | 40 (39-41)                 | 0.1   | 0.1 (-0.2, 0.4)  | 0.77                 | 0.77 (0.42, 1.39) |
|              | Per IQR (1.1 ng/mL) |                            | 0.1   | 0.1 (0.0, 0.2)   | 0.86                 | 0.87 (0.66, 1.14) |
|              | Per 0.1 ng/mL       |                            | 0.0   | 0.0 (0.0, 0.0)   | 0.99                 | 0.99 (0.96, 1.01) |
| <b>PFNA</b>  | Q1                  | 40 (39-41)                 | Ref.  | Ref.             | Ref.                 | Ref.              |
|              | Q2                  | 40 (39-41)                 | 0.1   | 0.1 (-0.2, 0.3)  | 0.83                 | 0.84 (0.44, 1.60) |
|              | Q3                  | 40 (39-41)                 | -0.1  | -0.1 (-0.4, 0.1) | 0.86                 | 0.87 (0.46, 1.65) |
|              | Q4                  | 40 (39-41)                 | 0.0   | 0.0 (-0.2, 0.3)  | 1.17                 | 1.18 (0.65, 2.16) |
|              | Per IQR (0.4 ng/mL) |                            | 0.0   | 0.0 (0.0, 0.1)   | 0.98                 | 0.99 (0.81, 1.20) |
|              | Per 0.1 ng/mL       |                            | 0.0   | 0.0 (0.0, 0.0)   | 0.99                 | 1.00 (0.94, 1.05) |
| <b>PFDA</b>  | Q1                  | 40 (39-41)                 | Ref.  | Ref.             | Ref.                 | Ref.              |
|              | Q2                  | 40 (39-41)                 | 0.1   | 0.1 (-0.2, 0.3)  | 0.81                 | 0.83 (0.44, 1.58) |
|              | Q3                  | 40 (39-41)                 | 0.1   | 0.1 (-0.2, 0.3)  | 0.82                 | 0.82 (0.43, 1.57) |
|              | Q4                  | 40 (39-41)                 | 0.1   | 0.1 (-0.2, 0.3)  | 1.06                 | 1.06 (0.58, 1.92) |
|              | Per IQR (0.2 ng/mL) |                            | 0.0   | 0.0 (0.0, 0.1)   | 0.98                 | 0.98 (0.81, 1.18) |
|              | Per 0.1 ng/mL       |                            | 0.0   | 0.0 (0.0, 0.1)   | 0.99                 | 0.99 (0.89, 1.10) |
| <b>PFUnA</b> | Q1                  | 40 (39-41)                 | Ref.  | Ref.             | Ref.                 | Ref.              |
|              | Q2                  | 40 (39-41)                 | 0.0   | 0.0 (-0.2, 0.3)  | 0.92                 | 0.91 (0.50, 1.67) |
|              | Q3                  | 40 (39-41)                 | 0.1   | 0.1 (-0.2, 0.3)  | 0.85                 | 0.84 (0.44, 1.59) |
|              | Q4                  | 40 (39-41)                 | 0.1   | 0.1 (-0.1, 0.4)  | 0.85                 | 0.81 (0.43, 1.51) |
|              | Per IQR (0.2 ng/mL) |                            | 0.0   | 0.0 (-0.1, 0.1)  | 0.95                 | 0.93 (0.75, 1.16) |
|              | Per 0.1 ng/mL       |                            | 0.0   | 0.0 (0.0, 0.1)   | 0.98                 | 0.97 (0.89, 1.06) |

Abbreviations: Quartile (Q), interquartile range (IQR), odds ratio (OR). See PFAA abbreviations in Table 1 in the main document. Preterm birth was defined at births before 37 gestational weeks and 0 days.

## References

Textor J, Hardt J, Knüppel S. 2011. DAGitty: a graphical tool for analyzing causal diagrams. *Epidemiology* 22:745; doi:10.1097/EDE.0b013e318225c2be.
